# Supplementary material for: Predator-Induced Morphological Plasticity Across Local Populations of a Freshwater Snail
Source: PLoS One. 2011 Jul 19;6(7):e21773. doi: 10.1371/journal.pone.0021773 (PMC3139574; doi:10.1371/journal.pone.0021773)
Supplement: Appendix S1 — Further details of the principal components analysis. (XLS) [file pone.0021773.s001.xls]

## Sheet: Sheet1
Dimension	Eigenvalue	Proportion of variances	Cumulative proportion
PC1	1.939132E-003	71.0995	71.0995
PC2	2.206479E-004	8.0902	79.1896
PC3	1.948987E-004	7.1461	86.3357
PC4	9.428230E-005	3.4569	89.7926
PC5	6.051767E-005	2.2189	92.0116
PC6	3.248650E-005	1.1911	93.2027
PC7	2.644173E-005	0.9695	94.1722
PC8	2.070189E-005	0.7590	94.9312
PC9	1.812549E-005	0.6646	95.5958
PC10	1.445804E-005	0.5301	96.1259
PC11	1.343312E-005	0.4925	96.6185
PC12	9.441250E-006	0.3462	96.9646
PC13	8.747532E-006	0.3207	97.2854
PC14	7.733877E-006	0.2836	97.5689
PC15	6.428547E-006	0.2357	97.8046
PC16	6.188691E-006	0.2269	98.0316
PC17	4.171095E-006	0.1529	98.1845
PC18	3.782261E-006	0.1387	98.3232
PC19	3.674642E-006	0.1347	98.4579
PC20	3.285853E-006	0.1205	98.5784
PC21	3.131167E-006	0.1148	98.6932
PC22	2.964722E-006	0.1087	98.8019
PC23	2.638857E-006	0.0968	98.8986
PC24	2.267566E-006	0.0831	98.9818
PC25	2.257055E-006	0.0828	99.0645
PC26	1.765603E-006	0.0647	99.1293
PC27	1.727814E-006	0.0634	99.1926
PC28	1.665097E-006	0.0611	99.2537
PC29	1.586015E-006	0.0582	99.3118
PC30	1.455503E-006	0.0534	99.3652
PC31	1.362542E-006	0.0500	99.4152
PC32	1.235958E-006	0.0453	99.4605
PC33	1.101842E-006	0.0404	99.5009
PC34	1.060247E-006	0.0389	99.5398
PC35	9.584019E-007	0.0351	99.5749
PC36	8.517286E-007	0.0312	99.6061
PC37	8.067068E-007	0.0296	99.6357
PC38	7.496692E-007	0.0275	99.6632
PC39	6.617658E-007	0.0243	99.6875
PC40	6.250015E-007	0.0229	99.7104
PC41	5.962116E-007	0.0219	99.7322
PC42	5.874587E-007	0.0215	99.7538
PC43	5.377562E-007	0.0197	99.7735
PC44	4.956505E-007	0.0182	99.7917
PC45	4.438710E-007	0.0163	99.8079
PC46	4.148366E-007	0.0152	99.8231
PC47	4.018334E-007	0.0147	99.8379
PC48	3.643186E-007	0.0134	99.8512
PC49	3.529765E-007	0.0129	99.8642
PC50	3.269698E-007	0.0120	99.8762
PC51	2.907707E-007	0.0107	99.8868
PC52	2.725436E-007	0.0100	99.8968
PC53	2.638845E-007	0.0097	99.9065
PC54	2.550416E-007	0.0094	99.9158
PC55	2.368960E-007	0.0087	99.9245
PC56	2.148662E-007	0.0079	99.9324
PC57	1.939933E-007	0.0071	99.9395
PC58	1.819635E-007	0.0067	99.9462
PC59	1.617202E-007	0.0059	99.9521
PC60	1.547104E-007	0.0057	99.9578
PC61	1.334329E-007	0.0049	99.9627
PC62	1.228333E-007	0.0045	99.9672
PC63	1.134160E-007	0.0042	99.9714
PC64	1.086708E-007	0.0040	99.9753
PC65	9.455269E-008	0.0035	99.9788
PC66	8.018323E-008	0.0029	99.9817
PC67	7.902245E-008	0.0029	99.9846
PC68	6.868412E-008	0.0025	99.9872
PC69	5.930497E-008	0.0022	99.9893
PC70	5.631094E-008	0.0021	99.9914
PC71	4.624242E-008	0.0017	99.9931
PC72	4.058342E-008	0.0015	99.9946
PC73	3.710534E-008	0.0014	99.9959
PC74	3.088929E-008	0.0011	99.9971
PC75	2.851945E-008	0.0010	99.9981
PC76	2.744447E-008	0.0010	99.9991
PC77	2.375775E-008	0.0009	100.0000
